# Supplementary material
Source: PubMed Central journal article supplement (PMC2951856)
Supplement: blood-2009-05-222471_1.pdf [file blood-2009-05-222471_1.pdf]

---

**I. Perturbing overall protein structure**

---

C330Y

---

**II. In the vicinity or within the binding cleft and could severely disrupt drug-binding**

---

|                                         | <b>Imatinib</b> | <b>Dasatinib</b> | <b>Nilotinib</b> |
|-----------------------------------------|-----------------|------------------|------------------|
| <b>In the vicinity of binding cleft</b> |                 |                  |                  |
| V304D                                   | +++             | -                | +++              |
| C369F                                   | ++              | ++               | ++               |
| E373G                                   | -               | +++              | -                |
| K378E                                   | +++             | +++              | +++              |
| V379I                                   | +++             | -                | +++              |
| <b>Within binding cleft</b>             |                 |                  |                  |
| T315I                                   | +++             | +++              | +++              |
